# Supplementary material for: Gpr149 is involved in energy homeostasis in the male mouse
Source: PeerJ. 2024 Jan 25;12:e16739. doi: 10.7717/peerj.16739 (PMC10822134; doi:10.7717/peerj.16739)
Supplement: Supplemental Information 2 — Table of raw Cq values for each tissue. The geen 18 s was used as a normalized and data were normalized relative to the hypothalamus. Tissues from three animals were pooled together. [file peerj-12-16739-s002.xlsx]

## Sheet: Tissues
0	Tissue	ug/ul
1	BAT
2	WAT
3	Eye
4	Brain stem
5	Cerebellum
6	Cerebrum
7	Corpus Striatum
8	Olfactory bulb
9	Spinal cord
10	Adrenals
11	Hypothalamus
12	Pituitary
13	Thyroid
14	Tongue
15	Stomach
16	Duodenum
17	Jejunum
18	Ileum
19	Colon
20	Gall Bladder
21	Kidney
22	Liver
23	Pancreas
24	Spleen
25	Thymus
26	Ovary
27	Uterus
28	Epididymus
29	Preputial Gland
30	Prostate
31	Seminal Vesicles
32	Testis
33	Vas Deferens
34	Aorta
35	Heart
36	Lungs
37	Bone
38	Muscle
39	Skin
40	Bone Marrow

## Sheet: Raw data
A001 Well	Fluor	Target	Content	number	tissue	Cq	Cq Mean	Cq Std. Dev
A01	FAM	18s	Unkn	1	BAT	15.1454	15.1454	0
A02	FAM	18s	Unkn	1	BAT	15.6601	15.6601	0
A03	FAM	18s	Unkn	1	BAT	15.0665	15.0665	0
A10	FAM	18s	Unkn	17	Jejunum	15.4671	15.4671	0
A11	FAM	18s	Unkn	17	Jejunum	15.7613	15.7613	0
A12	FAM	18s	Unkn	17	Jejunum	15.912	15.912	0
A19	FAM	18s	Unkn	33	vas diferens	16.7823	16.7823	0
A20	FAM	18s	Unkn	33	vas diferens	16.8983	16.8983	0
A21	FAM	18s	Unkn	33	vas diferens	16.8216	16.8216	0
B01	FAM	18s	Unkn	9	spinal cord	16.5173	16.5173	0
B02	FAM	18s	Unkn	9	spinal cord	16.2462	16.2462	0
B03	FAM	18s	Unkn	9	spinal cord	16.0265	16.0265	0
B10	FAM	18s	Unkn	25	Thymus	15.9442	15.9442	0
B11	FAM	18s	Unkn	25	Thymus	16.5497	16.5497	0
B12	FAM	18s	Unkn	25	Thymus	15.7777	15.7777	0
C01	FAM	18s	Unkn	2	wat		0	0
C02	FAM	18s	Unkn	2	wat	16.8962	16.8962	0
C03	FAM	18s	Unkn	2	wat	17.1446	17.1446	0
C10	FAM	18s	Unkn	18	Ileum	14.9858	14.9858	0
C11	FAM	18s	Unkn	18	Ileum	15.2161	15.2161	0
C12	FAM	18s	Unkn	18	Ileum	15.241	15.241	0
C19	FAM	18s	Unkn	34	Aorta	18.282	18.282	0
C20	FAM	18s	Unkn	34	Aorta	18.4147	18.4147	0
C21	FAM	18s	Unkn	34	Aorta	18.4612	18.4612	0
D01	FAM	18s	Unkn	10	Adrenals	15.0892	15.0892	0
D02	FAM	18s	Unkn	10	Adrenals	14.643	14.643	0
D03	FAM	18s	Unkn	10	Adrenals	15.162	15.162	0
D10	FAM	18s	Unkn	26	Ovary	15.6411	15.6411	0
D11	FAM	18s	Unkn	26	Ovary	15.761	15.761	0
D12	FAM	18s	Unkn	26	Ovary	15.4289	15.4289	0
E01	FAM	18s	Unkn	3	eye	14.9241	14.9241	0
E02	FAM	18s	Unkn	3	eye	15.0957	15.0957	0
E03	FAM	18s	Unkn	3	eye	15.3738	15.3738	0
E10	FAM	18s	Unkn	19	Colon	15.9199	15.9199	0
E11	FAM	18s	Unkn	19	Colon	16.5201	16.5201	0
E12	FAM	18s	Unkn	19	Colon	16.2418	16.2418	0
E19	FAM	18s	Unkn	35	heart	16.5472	16.5472	0
E20	FAM	18s	Unkn	35	heart	15.9011	15.9011	0
E21	FAM	18s	Unkn	35	heart	15.9076	15.9076	0
F01	FAM	18s	Unkn	11	hypothalamus	15.8633	15.8633	0
F02	FAM	18s	Unkn	11	hypothalamus	15.5206	15.5206	0
F03	FAM	18s	Unkn	11	hypothalamus	16.468	16.468	0
F10	FAM	18s	Unkn	27	Uterus	15.8276	15.8276	0
F11	FAM	18s	Unkn	27	Uterus	15.9685	15.9685	0
F12	FAM	18s	Unkn	27	Uterus	15.5553	15.5553	0
G01	FAM	18s	Unkn	4	Brain stem	16.0155	16.0155	0
G02	FAM	18s	Unkn	4	Brain stem	15.9211	15.9211	0
G03	FAM	18s	Unkn	4	Brain stem	16.3119	16.3119	0
G10	FAM	18s	Unkn	20	Gall Bladder	17.9105	17.9105	0
G11	FAM	18s	Unkn	20	Gall Bladder	18.2181	18.2181	0
G12	FAM	18s	Unkn	20	Gall Bladder	18.3376	18.3376	0
G19	FAM	18s	Unkn	36	Lungs	16.5886	16.5886	0
G20	FAM	18s	Unkn	36	Lungs	16.8934	16.8934	0
G21	FAM	18s	Unkn	36	Lungs	16.9209	16.9209	0
H01	FAM	18s	Unkn	12	Pituitary	14.736	14.736	0
H02	FAM	18s	Unkn	12	Pituitary	15.0103	15.0103	0
H03	FAM	18s	Unkn	12	Pituitary	15.2103	15.2103	0
H10	FAM	18s	Unkn	28	Epididymus	14.7467	14.7467	0
H11	FAM	18s	Unkn	28	Epididymus	15.0182	15.0182	0
H12	FAM	18s	Unkn	28	Epididymus	14.8498	14.8498	0
I01	FAM	18s	Unkn	5	Cerebellum	16.2876	16.2876	0
I02	FAM	18s	Unkn	5	Cerebellum	15.9373	15.9373	0
I03	FAM	18s	Unkn	5	Cerebellum	16.3947	16.3947	0
I10	FAM	18s	Unkn	21	Kidney	16.14	16.14	0
I11	FAM	18s	Unkn	21	Kidney	16.7417	16.7417	0
I12	FAM	18s	Unkn	21	Kidney	16.6599	16.6599	0
I19	FAM	18s	Unkn	37	Heart	19.1418	19.1418	0
I20	FAM	18s	Unkn	37	Heart	19.5145	19.5145	0
I21	FAM	18s	Unkn	37	Heart	19.3718	19.3718	0
J01	FAM	18s	Unkn	13	Thyroid	16.4372	16.4372	0
J02	FAM	18s	Unkn	13	Thyroid	16.1345	16.1345	0
J03	FAM	18s	Unkn	13	Thyroid	16.3406	16.3406	0
J10	FAM	18s	Unkn	29	Preputial gland	16.0059	16.0059	0
J11	FAM	18s	Unkn	29	Preputial gland	16.1483	16.1483	0
J12	FAM	18s	Unkn	29	Preputial gland	16.1299	16.1299	0
K01	FAM	18s	Unkn	6	Cerebrum	15.8106	15.8106	0
K02	FAM	18s	Unkn	6	Cerebrum	16.0514	16.0514	0
K03	FAM	18s	Unkn	6	Cerebrum	16.3431	16.3431	0
K10	FAM	18s	Unkn	22	Liver	17.2679	17.2679	0
K11	FAM	18s	Unkn	22	Liver	17.3848	17.3848	0
K12	FAM	18s	Unkn	22	Liver	17.3972	17.3972	0
K19	FAM	18s	Unkn	38	muscle	16.1134	16.1134	0
K20	FAM	18s	Unkn	38	muscle	16.33	16.33	0
K21	FAM	18s	Unkn	38	muscle	16.2895	16.2895	0
L01	FAM	18s	Unkn	14	tongue	17.3863	17.3863	0
L02	FAM	18s	Unkn	14	tongue	17.3516	17.3516	0
L03	FAM	18s	Unkn	14	tongue	17.3125	17.3125	0
L10	FAM	18s	Unkn	30	Prostate	16.2045	16.2045	0
L11	FAM	18s	Unkn	30	Prostate	16.3814	16.3814	0
L12	FAM	18s	Unkn	30	Prostate	16.0507	16.0507	0
M01	FAM	18s	Unkn	7	corpus striatum	16.9375	16.9375	0
M02	FAM	18s	Unkn	7	corpus striatum	16.7598	16.7598	0
M03	FAM	18s	Unkn	7	corpus striatum	16.542	16.542	0
M10	FAM	18s	Unkn	23	pancreas	19.3205	19.3205	0
M11	FAM	18s	Unkn	23	pancreas	19.4861	19.4861	0
M12	FAM	18s	Unkn	23	pancreas	19.4676	19.4676	0
M19	FAM	18s	Unkn	39	skin	21.076	21.076	0
M20	FAM	18s	Unkn	39	skin	21.1163	21.1163	0
M21	FAM	18s	Unkn	39	skin	21.1968	21.1968	0
N01	FAM	18s	Unkn	15	stomach	15.3969	15.3969	0
N02	FAM	18s	Unkn	15	stomach	15.2819	15.2819	0
N03	FAM	18s	Unkn	15	stomach	15.4097	15.4097	0
N10	FAM	18s	Unkn	31	seminal vessicles	18.6459	18.6459	0
N11	FAM	18s	Unkn	31	seminal vessicles	18.8069	18.8069	0
N12	FAM	18s	Unkn	31	seminal vessicles	18.7883	18.7883	0
O01	FAM	18s	Unkn	8	olfactory bulb	17.2359	17.2359	0
O02	FAM	18s	Unkn	8	olfactory bulb	16.1241	16.1241	0
O03	FAM	18s	Unkn	8	olfactory bulb	16.2849	16.2849	0
O10	FAM	18s	Unkn	24	spleen	17.9257	17.9257	0
O11	FAM	18s	Unkn	24	spleen	18.0521	18.0521	0
O12	FAM	18s	Unkn	24	spleen	18.0856	18.0856	0
O19	FAM	18s	Unkn	40	Bone marrow	20.3729	20.3729	0
O20	FAM	18s	Unkn	40	Bone marrow	20.4292	20.4292	0
O21	FAM	18s	Unkn	40	Bone marrow	20.5223	20.5223	0
P01	FAM	18s	Unkn	16	Duodenum	16.2504	16.2504	0
P02	FAM	18s	Unkn	16	Duodenum	15.0678	15.0678	0
P03	FAM	18s	Unkn	16	Duodenum	15.1947	15.1947	0
P10	FAM	18s	Unkn	32	Testis	15.374	15.374	0
P11	FAM	18s	Unkn	32	Testis	15.6211	15.6211	0
P12	FAM	18s	Unkn	32	Testis	15.41	15.41	0
A07	FAM	Chrm5	Unkn	1	BAT		0	0
A08	FAM	Chrm5	Unkn	1	BAT		0	0
A09	FAM	Chrm5	Unkn	1	BAT		0	0
A16	FAM	Chrm5	Unkn	17	Jejunum		0	0
A17	FAM	Chrm5	Unkn	17	Jejunum		0	0
A18	FAM	Chrm5	Unkn	17	Jejunum	39.7848	39.7848	0
A22	FAM	Chrm5	Unkn	33	vas diferens	35.1344	35.1344	0
A23	FAM	Chrm5	Unkn	33	vas diferens	36.1057	36.1057	0
A24	FAM	Chrm5	Unkn	33	vas diferens	36.0976	36.0976	0
B07	FAM	Chrm5	Unkn	9	spinal cord	33.8094	33.8094	0
B08	FAM	Chrm5	Unkn	9	spinal cord	34.0845	34.0845	0
B09	FAM	Chrm5	Unkn	9	spinal cord	34.388	34.388	0
B16	FAM	Chrm5	Unkn	25	Thymus	38.2867	38.2867	0
B17	FAM	Chrm5	Unkn	25	Thymus	38.5206	38.5206	0
B18	FAM	Chrm5	Unkn	25	Thymus	38.6657	38.6657	0
C07	FAM	Chrm5	Unkn	2	wat	38.5048	38.5048	0
C08	FAM	Chrm5	Unkn	2	wat		0	0
C09	FAM	Chrm5	Unkn	2	wat	38.7814	38.7814	0
C16	FAM	Chrm5	Unkn	18	Ileum	39.4362	39.4362	0
C17	FAM	Chrm5	Unkn	18	Ileum	38.5413	38.5413	0
C18	FAM	Chrm5	Unkn	18	Ileum		0	0
D07	FAM	Chrm5	Unkn	10	Adrenals		0	0
D08	FAM	Chrm5	Unkn	10	Adrenals	39.6562	39.6562	0
D09	FAM	Chrm5	Unkn	10	Adrenals		0	0
D16	FAM	Chrm5	Unkn	26	Ovary	38.1761	38.1761	0
D17	FAM	Chrm5	Unkn	26	Ovary	39.0349	39.0349	0
D18	FAM	Chrm5	Unkn	26	Ovary	39.0201	39.0201	0
E07	FAM	Chrm5	Unkn	3	eye	35.8118	35.8118	0
E08	FAM	Chrm5	Unkn	3	eye	35.5391	35.5391	0
E09	FAM	Chrm5	Unkn	3	eye	35.1041	35.1041	0
E16	FAM	Chrm5	Unkn	19	Colon		0	0
E17	FAM	Chrm5	Unkn	19	Colon	39.5943	39.5943	0
E18	FAM	Chrm5	Unkn	19	Colon		0	0
E22	FAM	Chrm5	Unkn	35	heart		0	0
E23	FAM	Chrm5	Unkn	35	heart		0	0
E24	FAM	Chrm5	Unkn	35	heart	38.2924	38.2924	0
F07	FAM	Chrm5	Unkn	11	hypothalamus	31.6532	31.6532	0
F08	FAM	Chrm5	Unkn	11	hypothalamus	31.5479	31.5479	0
F09	FAM	Chrm5	Unkn	11	hypothalamus	31.6956	31.6956	0
F16	FAM	Chrm5	Unkn	27	Uterus	36.8991	36.8991	0
F17	FAM	Chrm5	Unkn	27	Uterus	36.8054	36.8054	0
F18	FAM	Chrm5	Unkn	27	Uterus	37.1203	37.1203	0
G07	FAM	Chrm5	Unkn	4	Brain stem	32.6093	32.6093	0
G08	FAM	Chrm5	Unkn	4	Brain stem	32.3736	32.3736	0
G09	FAM	Chrm5	Unkn	4	Brain stem	32.7136	32.7136	0
G16	FAM	Chrm5	Unkn	20	Gall Bladder		0	0
G17	FAM	Chrm5	Unkn	20	Gall Bladder		0	0
G18	FAM	Chrm5	Unkn	20	Gall Bladder		0	0
G22	FAM	Chrm5	Unkn	36	Lungs	39.8265	39.8265	0
G23	FAM	Chrm5	Unkn	36	Lungs		0	0
G24	FAM	Chrm5	Unkn	36	Lungs		0	0
H07	FAM	Chrm5	Unkn	12	Pituitary	36.7202	36.7202	0
H08	FAM	Chrm5	Unkn	12	Pituitary	37.4623	37.4623	0
H09	FAM	Chrm5	Unkn	12	Pituitary	36.0963	36.0963	0
H16	FAM	Chrm5	Unkn	28	Epididymus	36.0275	36.0275	0
H17	FAM	Chrm5	Unkn	28	Epididymus	35.9146	35.9146	0
H18	FAM	Chrm5	Unkn	28	Epididymus	35.4107	35.4107	0
I07	FAM	Chrm5	Unkn	5	Cerebellum	35.9272	35.9272	0
I08	FAM	Chrm5	Unkn	5	Cerebellum	36.867	36.867	0
I09	FAM	Chrm5	Unkn	5	Cerebellum	36.2576	36.2576	0
I16	FAM	Chrm5	Unkn	21	Kidney	36.0899	36.0899	0
I17	FAM	Chrm5	Unkn	21	Kidney	36.7504	36.7504	0
I18	FAM	Chrm5	Unkn	21	Kidney	37.7657	37.7657	0
I22	FAM	Chrm5	Unkn	37	Heart		0	0
I23	FAM	Chrm5	Unkn	37	Heart		0	0
I24	FAM	Chrm5	Unkn	37	Heart		0	0
J07	FAM	Chrm5	Unkn	13	Thyroid	37.7682	37.7682	0
J08	FAM	Chrm5	Unkn	13	Thyroid	38.5794	38.5794	0
J09	FAM	Chrm5	Unkn	13	Thyroid		0	0
J16	FAM	Chrm5	Unkn	29	Preputial gland		0	0
J17	FAM	Chrm5	Unkn	29	Preputial gland	39.6053	39.6053	0
J18	FAM	Chrm5	Unkn	29	Preputial gland	39.6242	39.6242	0
J22	FAM	Chrm5	Unkn	37	Bone		0	0
J23	FAM	Chrm5	Unkn	37	Bone		0	0
J24	FAM	Chrm5	Unkn	37	Bone		0	0
K07	FAM	Chrm5	Unkn	6	Cerebrum	34.8247	34.8247	0
K08	FAM	Chrm5	Unkn	6	Cerebrum	35.7914	35.7914	0
K09	FAM	Chrm5	Unkn	6	Cerebrum	35.1859	35.1859	0
K16	FAM	Chrm5	Unkn	22	Liver	38.0919	38.0919	0
K17	FAM	Chrm5	Unkn	22	Liver	38.2615	38.2615	0
K18	FAM	Chrm5	Unkn	22	Liver	39.062	39.062	0
K22	FAM	Chrm5	Unkn	38	muscle		0	0
K23	FAM	Chrm5	Unkn	38	muscle		0	0
K24	FAM	Chrm5	Unkn	38	muscle		0	0
L07	FAM	Chrm5	Unkn	14	tongue	36.9418	36.9418	0
L08	FAM	Chrm5	Unkn	14	tongue	37.0001	37.0001	0
L09	FAM	Chrm5	Unkn	14	tongue	37.5657	37.5657	0
L16	FAM	Chrm5	Unkn	30	Prostate	38.622	38.622	0
L17	FAM	Chrm5	Unkn	30	Prostate	36.9086	36.9086	0
L18	FAM	Chrm5	Unkn	30	Prostate	37.6147	37.6147	0
M07	FAM	Chrm5	Unkn	7	corpus striatum	32.5863	32.5863	0
M08	FAM	Chrm5	Unkn	7	corpus striatum	32.6154	32.6154	0
M09	FAM	Chrm5	Unkn	7	corpus striatum	32.6167	32.6167	0
M16	FAM	Chrm5	Unkn	23	pancreas	39.5091	39.5091	0
M17	FAM	Chrm5	Unkn	23	pancreas	39.8851	39.8851	0
M18	FAM	Chrm5	Unkn	23	pancreas		0	0
M22	FAM	Chrm5	Unkn	39	skin	37.8727	37.8727	0
M23	FAM	Chrm5	Unkn	39	skin	38.5883	38.5883	0
M24	FAM	Chrm5	Unkn	39	skin	37.6942	37.6942	0
N07	FAM	Chrm5	Unkn	15	stomach	39.2554	39.2554	0
N08	FAM	Chrm5	Unkn	15	stomach		0	0
N09	FAM	Chrm5	Unkn	15	stomach	38.5533	38.5533	0
N16	FAM	Chrm5	Unkn	31	seminal vessicles	37.2194	37.2194	0
N17	FAM	Chrm5	Unkn	31	seminal vessicles	37.4783	37.4783	0
N18	FAM	Chrm5	Unkn	31	seminal vessicles	36.6821	36.6821	0
O07	FAM	Chrm5	Unkn	8	olfactory bulb	35.6085	35.6085	0
O08	FAM	Chrm5	Unkn	8	olfactory bulb	35.2377	35.2377	0
O09	FAM	Chrm5	Unkn	8	olfactory bulb	35.7123	35.7123	0
O16	FAM	Chrm5	Unkn	24	spleen	37.5925	37.5925	0
O17	FAM	Chrm5	Unkn	24	spleen	38.1645	38.1645	0
O18	FAM	Chrm5	Unkn	24	spleen		0	0
O22	FAM	Chrm5	Unkn	40	Bone marrow		0	0
O23	FAM	Chrm5	Unkn	40	Bone marrow		0	0
O24	FAM	Chrm5	Unkn	40	Bone marrow		0	0
P07	FAM	Chrm5	Unkn	16	Duodenum	39.8065	39.8065	0
P08	FAM	Chrm5	Unkn	16	Duodenum	39.5619	39.5619	0
P09	FAM	Chrm5	Unkn	16	Duodenum	39.987	39.987	0
P16	FAM	Chrm5	Unkn	32	Testis	33.4908	33.4908	0
P17	FAM	Chrm5	Unkn	32	Testis	34.0536	34.0536	0
P18	FAM	Chrm5	Unkn	32	Testis	33.6612	33.6612	0
A04	FAM	Gpr149	Unkn	1	BAT		0	0
A05	FAM	Gpr149	Unkn	1	BAT		0	0
A06	FAM	Gpr149	Unkn	1	BAT		0	0
A13	FAM	Gpr149	Unkn	17	Jejunum	37.1204	37.1204	0
A14	FAM	Gpr149	Unkn	17	Jejunum	37.6045	37.6045	0
A15	FAM	Gpr149	Unkn	17	Jejunum	38.0199	38.0199	0
B04	FAM	Gpr149	Unkn	9	spinal cord	32.8313	32.8313	0
B05	FAM	Gpr149	Unkn	9	spinal cord	32.8734	32.8734	0
B06	FAM	Gpr149	Unkn	9	spinal cord	32.8265	32.8265	0
B13	FAM	Gpr149	Unkn	25	Thymus	39.2744	39.2744	0
B14	FAM	Gpr149	Unkn	25	Thymus		0	0
B15	FAM	Gpr149	Unkn	25	Thymus		0	0
B19	FAM	Gpr149	Unkn	33	vas diferens		0	0
B20	FAM	Gpr149	Unkn	33	vas diferens		0	0
B21	FAM	Gpr149	Unkn	33	vas diferens		0	0
C04	FAM	Gpr149	Unkn	2	wat		0	0
C05	FAM	Gpr149	Unkn	2	wat		0	0
C06	FAM	Gpr149	Unkn	2	wat		0	0
C13	FAM	Gpr149	Unkn	18	Ileum	35.4596	35.4596	0
C14	FAM	Gpr149	Unkn	18	Ileum	35.0874	35.0874	0
C15	FAM	Gpr149	Unkn	18	Ileum	35.2647	35.2647	0
C22	FAM	Gpr149	Unkn	34	Aorta		0	0
C23	FAM	Gpr149	Unkn	34	Aorta	39.7613	39.7613	0
C24	FAM	Gpr149	Unkn	34	Aorta		0	0
D04	FAM	Gpr149	Unkn	10	Adrenals	38.4366	38.4366	0
D05	FAM	Gpr149	Unkn	10	Adrenals	39.4061	39.4061	0
D06	FAM	Gpr149	Unkn	10	Adrenals		0	0
D13	FAM	Gpr149	Unkn	26	Ovary		0	0
D14	FAM	Gpr149	Unkn	26	Ovary	35.8079	35.8079	0
D15	FAM	Gpr149	Unkn	26	Ovary	36.1787	36.1787	0
D19	FAM	Gpr149	Unkn	34	Aorta		0	0
D20	FAM	Gpr149	Unkn	34	Aorta		0	0
D21	FAM	Gpr149	Unkn	34	Aorta		0	0
E04	FAM	Gpr149	Unkn	3	eye	33.9067	33.9067	0
E05	FAM	Gpr149	Unkn	3	eye	33.7014	33.7014	0
E06	FAM	Gpr149	Unkn	3	eye	34.3092	34.3092	0
E13	FAM	Gpr149	Unkn	19	Colon	36.8619	36.8619	0
E14	FAM	Gpr149	Unkn	19	Colon	36.5583	36.5583	0
E15	FAM	Gpr149	Unkn	19	Colon	36.2212	36.2212	0
F04	FAM	Gpr149	Unkn	11	hypothalamus	31.7765	31.7765	0
F05	FAM	Gpr149	Unkn	11	hypothalamus	32.0895	32.0895	0
F06	FAM	Gpr149	Unkn	11	hypothalamus	32.1095	32.1095	0
F13	FAM	Gpr149	Unkn	27	Uterus	37.5443	37.5443	0
F14	FAM	Gpr149	Unkn	27	Uterus	36.2785	36.2785	0
F15	FAM	Gpr149	Unkn	27	Uterus		0	0
G04	FAM	Gpr149	Unkn	4	Brain stem	32.2349	32.2349	0
G05	FAM	Gpr149	Unkn	4	Brain stem	32.495	32.495	0
G06	FAM	Gpr149	Unkn	4	Brain stem	32.4793	32.4793	0
G13	FAM	Gpr149	Unkn	20	Gall Bladder		0	0
G14	FAM	Gpr149	Unkn	20	Gall Bladder		0	0
G15	FAM	Gpr149	Unkn	20	Gall Bladder		0	0
H04	FAM	Gpr149	Unkn	12	Pituitary	31.1143	31.1143	0
H05	FAM	Gpr149	Unkn	12	Pituitary	31.1509	31.1509	0
H06	FAM	Gpr149	Unkn	12	Pituitary	31.073	31.073	0
H13	FAM	Gpr149	Unkn	28	Epididymus		0	0
H14	FAM	Gpr149	Unkn	28	Epididymus		0	0
H15	FAM	Gpr149	Unkn	28	Epididymus		0	0
H19	FAM	Gpr149	Unkn	36	Lungs		0	0
H20	FAM	Gpr149	Unkn	36	Lungs		0	0
H21	FAM	Gpr149	Unkn	36	Lungs		0	0
I04	FAM	Gpr149	Unkn	5	Cerebellum	37.9042	37.9042	0
I05	FAM	Gpr149	Unkn	5	Cerebellum	38.2963	38.2963	0
I06	FAM	Gpr149	Unkn	5	Cerebellum	38.4821	38.4821	0
I13	FAM	Gpr149	Unkn	21	Kidney		0	0
I14	FAM	Gpr149	Unkn	21	Kidney		0	0
I15	FAM	Gpr149	Unkn	21	Kidney		0	0
J04	FAM	Gpr149	Unkn	13	Thyroid		0	0
J05	FAM	Gpr149	Unkn	13	Thyroid		0	0
J06	FAM	Gpr149	Unkn	13	Thyroid		0	0
J13	FAM	Gpr149	Unkn	29	Preputial gland		0	0
J14	FAM	Gpr149	Unkn	29	Preputial gland		0	0
J15	FAM	Gpr149	Unkn	29	Preputial gland		0	0
J19	FAM	Gpr149	Unkn	37	Bone		0	0
J20	FAM	Gpr149	Unkn	37	Bone		0	0
J21	FAM	Gpr149	Unkn	37	Bone		0	0
K04	FAM	Gpr149	Unkn	6	Cerebrum	34.7794	34.7794	0
K05	FAM	Gpr149	Unkn	6	Cerebrum	34.8036	34.8036	0
K06	FAM	Gpr149	Unkn	6	Cerebrum	35.0242	35.0242	0
K13	FAM	Gpr149	Unkn	22	Liver		0	0
K14	FAM	Gpr149	Unkn	22	Liver		0	0
K15	FAM	Gpr149	Unkn	22	Liver		0	0
L04	FAM	Gpr149	Unkn	14	tongue	39.6569	39.6569	0
L05	FAM	Gpr149	Unkn	14	tongue		0	0
L06	FAM	Gpr149	Unkn	14	tongue	39.0469	39.0469	0
L13	FAM	Gpr149	Unkn	30	Prostate	36.2646	36.2646	0
L14	FAM	Gpr149	Unkn	30	Prostate	36.2798	36.2798	0
L15	FAM	Gpr149	Unkn	30	Prostate	37.5969	37.5969	0
L19	FAM	Gpr149	Unkn	39	skin		0	0
L20	FAM	Gpr149	Unkn	39	skin		0	0
L21	FAM	Gpr149	Unkn	39	skin		0	0
M04	FAM	Gpr149	Unkn	7	corpus striatum	32.0415	32.0415	0
M05	FAM	Gpr149	Unkn	7	corpus striatum	32.2291	32.2291	0
M06	FAM	Gpr149	Unkn	7	corpus striatum	32.2335	32.2335	0
M13	FAM	Gpr149	Unkn	23	pancreas		0	0
M14	FAM	Gpr149	Unkn	23	pancreas		0	0
M15	FAM	Gpr149	Unkn	23	pancreas		0	0
N04	FAM	Gpr149	Unkn	15	stomach		0	0
N05	FAM	Gpr149	Unkn	15	stomach		0	0
N06	FAM	Gpr149	Unkn	15	stomach	39.8631	39.8631	0
N13	FAM	Gpr149	Unkn	31	seminal vessicles		0	0
N14	FAM	Gpr149	Unkn	31	seminal vessicles	39.3352	39.3352	0
N15	FAM	Gpr149	Unkn	31	seminal vessicles		0	0
N19	FAM	Gpr149	Unkn	39	skin		0	0
N20	FAM	Gpr149	Unkn	39	skin	39.7251	39.7251	0
N21	FAM	Gpr149	Unkn	39	skin		0	0
O04	FAM	Gpr149	Unkn	8	olfactory bulb	33.9284	33.9284	0
O05	FAM	Gpr149	Unkn	8	olfactory bulb	34.2144	34.2144	0
O06	FAM	Gpr149	Unkn	8	olfactory bulb	34.5846	34.5846	0
O13	FAM	Gpr149	Unkn	24	spleen		0	0
O14	FAM	Gpr149	Unkn	24	spleen		0	0
O15	FAM	Gpr149	Unkn	24	spleen		0	0
P04	FAM	Gpr149	Unkn	16	Duodenum	35.2714	35.2714	0
P05	FAM	Gpr149	Unkn	16	Duodenum	36.8443	36.8443	0
P06	FAM	Gpr149	Unkn	16	Duodenum	37.2241	37.2241	0
P13	FAM	Gpr149	Unkn	32	Testis		0	0
P14	FAM	Gpr149	Unkn	32	Testis		0	0
P15	FAM	Gpr149	Unkn	32	Testis		0	0

## Sheet: Analyzed
					Tissue	average 18s	average Gpr149	dct	ddct	relative to hypothalamus
M03	FAM	18s	Unkn	7	corpus striatum	16.7465	32.168	15.4216	0.619623	153
F03	FAM	18s	Unkn	11	hypothalamus	15.9506	31.9918	16.0412	0	100
H03	FAM	18s	Unkn	12	Pituitary	14.9855	31.1127	16.1272	-0.0859987	94.2132
G03	FAM	18s	Unkn	4	Brain stem	16.0828	32.403	16.3202	-0.279015	82.4154
B03	FAM	18s	Unkn	9	spinal cord	16.2633	32.8437	16.5804	-0.539215	68.8145
O03	FAM	18s	Unkn	8	olfactory bulb	16.5483	34.2425	17.6942	-1.65298	31.7982
K03	FAM	18s	Unkn	6	Cerebrum	16.0684	34.8691	18.8007	-2.7595	14.7675
E03	FAM	18s	Unkn	3	eye	15.1312	33.9724	18.8412	-2.80003	14.3584
C12	FAM	18s	Unkn	18	Ileum	15.1476	35.2706	20.123	-4.08176	5.90567
E12	FAM	18s	Unkn	19	Colon	16.2272	36.5471	20.3199	-4.27869	5.15213
D12	FAM	18s	Unkn	26	Ovary	15.6103	35.9933	20.383	-4.34181	4.93157
L12	FAM	18s	Unkn	30	Prostate	16.2122	36.7138	20.5016	-4.46035	4.54256
N12	FAM	18s	Unkn	31	seminal vessicles	18.747	39.3352	20.5882	-4.54695	4.27791
P03	FAM	18s	Unkn	16	Duodenum	15.5043	36.4466	20.9423	-4.90106	3.34684
F12	FAM	18s	Unkn	27	Uterus	15.7838	36.9114	21.1276	-5.08642	2.9433
C21	FAM	18s	Unkn	34	Aorta	18.386	39.7613	21.3754	-5.33417	2.47887
A12	FAM	18s	Unkn	17	Jejunum	15.7135	37.5816	21.8681	-5.82693	1.76165
L03	FAM	18s	Unkn	14	tongue	17.3501	39.3519	22.0018	-5.96056	1.6058
I03	FAM	18s	Unkn	5	Cerebellum	16.2066	38.2275	22.021	-5.97976	1.58458
B12	FAM	18s	Unkn	25	Thymus	16.0905	39.2744	23.1838	-7.14264	0.707704
D03	FAM	18s	Unkn	10	Adrenals	14.9647	38.9214	23.9566	-7.91542	0.414209
N03	FAM	18s	Unkn	15	stomach	15.3628	39.8631	24.5002	-8.45905	0.284167
O21	FAM	18s	Unkn	40	Bone marrow	20.4415	100	79.5585	-63.5173	7.57508e-18
M12	FAM	18s	Unkn	23	pancreas	19.4247	100	80.5753	-64.5341	3.74378e-18
I21	FAM	18s	Unkn	37	Bone	19.3427	100	80.6573	-64.6161	3.53679e-18
G12	FAM	18s	Unkn	20	Gall Bladder	18.1554	100	81.8446	-65.8034	1.5531e-18
O12	FAM	18s	Unkn	24	spleen	18.0211	100	81.9789	-65.9377	1.41509e-18
K12	FAM	18s	Unkn	22	Liver	17.35	100	82.65	-66.6088	8.88679e-19
C03	FAM	18s	Unkn	2	wat	17.0204	100	82.9796	-66.9384	7.07178e-19
A21	FAM	18s	Unkn	33	vas diferens	16.8341	100	83.1659	-67.1247	6.21495e-19
G21	FAM	18s	Unkn	36	Lungs	16.801	100	83.199	-67.1578	6.07411e-19
I12	FAM	18s	Unkn	21	Kidney	16.5138	100	83.4862	-67.445	4.97789e-19
J03	FAM	18s	Unkn	13	Thyroid	16.3041	100	83.6959	-67.6547	4.30437e-19
K21	FAM	18s	Unkn	38	muscle	16.2443	100	83.7557	-67.7145	4.12963e-19
E21	FAM	18s	Unkn	35	heart	16.1186	100	83.8814	-67.8402	3.78506e-19
J12	FAM	18s	Unkn	29	Preputial gland	16.0947	100	83.9053	-67.8641	3.72277e-19
P12	FAM	18s	Unkn	32	Testis	15.4683	100	84.5317	-68.4905	2.41167e-19
A03	FAM	18s	Unkn	1	BAT	15.2907	100	84.7093	-68.6681	2.13229e-19
H12	FAM	18s	Unkn	28	Epididymus	14.8715	100	85.1285	-69.0873	1.59464e-19
