# Supplementary material for: Gpr149 is involved in energy homeostasis in the male mouse
Source: PeerJ. 2024 Jan 25;12:e16739. doi: 10.7717/peerj.16739 (PMC10822134; doi:10.7717/peerj.16739)
Supplement: Supplemental Information 3 [file peerj-12-16739-s003.xlsx]

## Sheet: RNA
	mouse	concentration		RNA	water
A1	2419	245.9	ng/ul	4.06669	3.93331
B1	2529	53.24	ng/ul	8	0
D1	2912	220.2	ng/ul	4.54133	3.45867
E1	2914	2260	ng/ul	0.442478	7.55752
F1	2195	177.9	ng/ul	5.62114	2.37886
G1	2196	322.9	ng/ul	3.09693	4.90307
H1	2919	50.21	ng/ul	8	0
A2	2923	257.3	ng/ul	3.88651	4.11349
B2	2925	1042	ng/ul	0.959693	7.04031
C2	2926	25.68	ng/ul	8	0
D2	2929	494.3	ng/ul	2.02306	5.97694
E2	2939	374.4	ng/ul	2.67094	5.32906
F2	2941	497.5	ng/ul	2.01005	5.98995
G2	2948	170.2	ng/ul	5.87544	2.12456
H2	2983	316.9	ng/ul	3.15557	4.84443
A3	2988	370.2	ng/ul	2.70124	5.29876
B3	3420	198.1	ng/ul	5.04796	2.95204
D3	3426	233.4	ng/ul	4.28449	3.71551
E3	3428	360	ng/ul	2.77778	5.22222

## Sheet: plate set up
		.1-3	.4-6	.7-9	.10-12
	A	2419	3420	2419	3420
	B	2925		2925
	C	2529	3426	2529	3426
	D	2926		2926
	E	2912	3428	2912	3428
	F	2929		2929
	G	2914		2914
	H	2939		2939
	I	2195		2195
	J	2941		2941
	K	2196		2196
	L	2948		2948
	M	2919		2919
	N	2983		2983
	O	2923		2923
	P	2988		2988
	GPR149	70			18S	70
	REAGENT	1X	70X		REAGENT	1X	70X
	MASTER MIX	5.5	385		MASTER MIX	5.5	385
	PROBE	0.55	38.5		PROBE	0.55	38.5
	ADD 6 UL OF Mastermix+probe/ well
	Add 5 ul of cDNA per well
	add 3 ul cDNA to 57 ul of H20

## Sheet: analysis
	Gpr149	CT1	CT2	CT3	Average		18s	CT1	CT2	CT3	Average			delta ct	ddct	2^N
wt	2419	32.3937	32.9911	32.6723	32.6857		2419	16.0329	16.0274	16.003	16.0211		WT	16.6646	0	1		Gpr149 WT		Gpr149 Het		Gpr149 KO
wt	2925	35.1005	35.3072	35.0536	35.1538		2925	20.0938	19.9109	20.2547	20.0865		WT	15.0673	1.5973	3.02577		2419	1	2529	2.27248	2926	0
het	2529	34.2978	34.7868	34.6997	34.5948		2529	19.0239	19.2495	19.0699	19.1144		Het	15.4803	1.18426	2.27248		2925	3.02577	2912	0.512073	2914	0
ko	2926	100	100	100	100		2926	18.4017	18.5206	18.4853	18.4692		KO	81.5308	-64.8662	2.97395e-20		2941	1.22368	2929	0.777123	2939	0
het	2912	34.2615	34.507	34.429	34.3992		2912	16.7523	16.7367	16.8181	16.769		Het	17.6302	-0.965578	0.512073		2948	0.922223	2915	0.575499	2983	0
het	2929	33.4304	33.3383	33.5697	33.4461		2929	15.5181	15.5497	18.1854	16.4177		Het	17.0284	-0.363786	0.777123		3420	0.89893	2916	0.401592	2988	0
ko	2914	100	100	100	100		2914	16.5442	16.3682	16.5547	16.489		KO	83.511	-66.8464	7.53773e-21				2919	0.365207	3426	0
ko	2939	100	100	100	100		2939	14.9743	15.1422	15.1228	15.0798		KO	84.9202	-68.2556	2.83794e-21				2923	0.321372
het	2915	34.0608	33.6126	33.676	33.7831		2915	16.2745	16.3134	16.3764	16.3214		Het	17.4617	-0.797115	0.575499				3428	0.317429
wt	2941	33.1807	33.4038	33.2962	33.2936		2941	16.827	17.0168	16.9167	16.9202		WT	16.3734	0.291227	1.22368
het	2916	33.5243	33.6968	33.3472	33.5227		2916	15.6292	15.4809	15.5158	15.542		Het	17.9808	-1.3162	0.401592		Average	1.41412		0.692846		0
wt	2948	31.6568	31.6463	31.6664	31.6565		2948	14.8734	14.7481	15.0038	14.8751		WT	16.7814	-0.116812	0.922223
het	2919	34.5737	34.5992	34.4773	34.5501		2919	16.4323	16.3746	16.4899	16.4322		Het	18.1178	-1.45321	0.365207		normalized
ko	2983	100	100	100	100		2983	16.3941	16.4659	16.5118	16.4572		KO	83.5428	-66.8782	7.37338e-21		wt		het		ko
het	2923	34.0448	33.7424	33.7044	33.8306		2923	15.4462	15.4948	15.6439	15.5283		Het	18.3023	-1.63768	0.321372		2419	0.707154	2529	1.60699	2926	0
ko	2988	100	100	100	100		2988	14.6	14.7064	14.6991	14.6685		KO	85.3315	-68.6669	2.13404e-21		2925	2.13968	2912	0.362114	2914	0
wt	3420	32.9481	32.3334	32.416	32.5658		3420	16.1252	15.5079	15.6095	15.7475		WT	16.8183	-0.153719	0.89893		2941	0.86533	2929	0.549545	2939	0
ko	3426	100	100	100	100		3426	15.3244	15.3997	15.3878	15.3706		KO	84.6294	-67.9648	3.47184e-21		2948	0.652154	2915	0.406966	2983	0
het	3428	33.6744	33.519	33.6932	33.6289		3428	15.3171	15.3156	15.2938	15.3088		Het	18.3201	-1.6555	0.317429		3420	0.635682	2916	0.283987	2988	0
																				2919	0.258258	3426	0
																				2923	0.22726
																				3428	0.224471
																		wt		het		ko
																	average		1		0.489949		0
																	SEM		0.287793		0.164216		0
																	pvalue wt vs Het		0.123598

## Sheet: Statistical results
ANOVA summary
F	6.905
P value	0.0069
P value summary	**
Significant diff. among means (P < 0.05)?	Yes
R squared	0.4633
Brown-Forsythe test
F (DFn, DFd)	1.029 (2, 16)
P value	0.3797
P value summary	ns
Are SDs significantly different (P < 0.05)?	No
Bartlett's test
Bartlett's statistic (corrected)
P value
P value summary
Are SDs significantly different (P < 0.05)?
ANOVA table	SS	DF	MS	F (DFn, DFd)	P value
Treatment (between columns)	2.733	2	1.367	F (2, 16) = 6.905	P=0.0069
Residual (within columns)	3.167	16	0.1979
Total	5.9	18
Data summary
Number of treatments (columns)	3
Number of values (total)	19
