# Supplementary material for: Gpr149 is involved in energy homeostasis in the male mouse
Source: PeerJ. 2024 Jan 25;12:e16739. doi: 10.7717/peerj.16739 (PMC10822134; doi:10.7717/peerj.16739)
Supplement: Supplemental Information 5 [file peerj-12-16739-s005.xlsx]

## Sheet: Body weight
Diet					NCD	NCD	NCD	NCD	NCD	NCD	NCD	NCD	NCD	NCD	HFD	HFD	HFD	HFD	HFD	HFD	HFD
mouse	sex	Cage	Date of Birth	Genotype	4 weeks	5 weeks	6 weeks	7 weeks	8 weeks	9 weeks	10 weeks	11 weeks	12 weeks	13 weeks	14 weeks	15 weeks	16 weeks	17 weeks	18 weeks	19 weeks	20 weeks
2529	Male	4305	2019-06-15	het	12.77	15.86	17.51	19.9	21.66	22.61	23.5	23.37	24.27	24.67		27.25	29.02	31	31.98	34.24	34.59
2912	Male	4305	2019-06-12	het	12.76	17.37	18.87	21.24	22.7	23.39	23.56	24.07	24.33	25.18	26.69	26.66	29.43	30.65	32.76	35.1	34.65
2915	Male	4304	2019-06-12	het	12.05	17.64	18.32	20.3	22.39	23.98	24.62	24.51	23.94	25.11	28.69	28.74	32.09	33.96	36.07	37.09	38.44
2916	Male	4304	2019-06-12	het	11.55	18.89	19.28	22.32	24.2	24.52	24.91	26.16	26.6	26.97	30.34	31.26	35.23	37.61	40.25	41.88	42.75
2919	Male	4306	2019-06-12	het	14.3	19.64	21.98	23.84	27.17	27.47	29.42	28.74	29.14	31.12	36.47	39.16	44.34	46.3	48.31	49.5	49.11
2923	Male	4307	2019-06-15	het	14.8	16.99	19.74	22.44	25.22	25.93	26.47	27.08	26.88	26.77	29.79	30.22	32.89	34.31	35.18	36.8	36.18
2929	Male	4305	2019-06-15	het	13.74	18.33	19.96	22.33	23.85	24.9	25.63	25.72	26.78	26.86	28.32	28.92	31.37	33.36	35.88	38.63	38.68
3428	Male	4308	2019-06-22	het	14.18	19.23	20.63	21.56	21.63	22.73	22.78	23.96	24.92	25.64	29.04	31.36	33.1	33.91	35.34	37.91	35.99
2914	Male	4306	2019-06-12	ko	12.7	18.08	20.01	23.24	24.66	25.14	25.06	26.13	27.25	28.36	30.97	32.33	35.86	38.43	40.78	43.67	45
2924	Male	4306	2019-06-15	ko	14.16	18.1	18.81	19.99	21.09	21.71	21.8	22.43	21.98	22.68	25.9	27.64	30.73	31.72	32.34	32.16	28.07
2926	Male	4307	2019-06-15	ko	14.49	17.93	19.81	21.27	23.24	24.3	24.16	24.32	24.62	23.12	28.63	30.52	34.24	35.11	37.08	39.61	39.63
2939	Male	4305	2019-06-13	ko	12.49	16.57	18.24	19.75	20	20.46	20.35	21.58	21.71	22.34	25.16	25.5	26.61	29.38	30.78	33.97	34.23
2550	Male	4306	2019-06-14	ko	14.03	17.71	19.47	21.51	23.67	24.81	24.61	24.74	25.53	26.01	28.24	28.82	31.86	33.49	34.73	35.47	35.83
2983	Male	4304	2019-06-16	ko	10.43	15.37	18.18	21.09	23.36	24	24.53	25.73	25.98	26.55	29.63	29.3	32.85	35.26	37.04	39.49	40.47
2988	Male	4304	2019-06-16	ko	10.43	15.63	17.28	19.47	21.99	22.56	23.35	24.09	24.4	24.71	28.16	28.22	31.71	32.59	34.36	36.15	36.19
3434	Male	4308	2018-06-28	ko	12.63	18.09	20.4	21.44	22.19	23.22	22.81	23.4	23.73	25.02	26.6	27.46	29.11	30.65	31.13	34.15	33.34
3426	Male	4308	2019-06-22	ko	12.52	16.25	18.42	19.23	19.55	21.02	20.86	21.68	23.33	24.5	27.21	28.4	30.62	31.92	32.02	33.48	32.64
2925	Male	4306	2019-06-15	wt	13.42	18.3	20.91	23.39	24.43	26.09	27.19	27.47	28.15	28.26	33.07	35.2	38.97	41.21	42.99	45.1	44.57
2941	Male	4307	2019-06-14	wt	14.56	19.02	21.64	24.01	26.34	26.31	27.02	28.59	29.09	28.62	33.42	34.89	38.96	40.57	41.71	43.72	44.83
2948	Male	4307	2019-06-13	wt	14.54	16.56	18.64	20.79	22.05	22.8	23.21	23.97	23.3	23.94	27.67	28.86	32.17	32.49	34.1	37	37.47
2419	Male	4305	2019-06-22	wt	12.71	16.72	20.4	21.98	22.8	24.82	25.04	25.36	26.82	27.44	31.4	33.76	35.73	37.48	38.11	39.49	39.5
3420	Male	4308	2019-06-22	wt	12.5	17.22	20.03	21.12	21.15	23.01	22.29	23.3	23.7	24.56	27.82	29.15	31.85	34.78	35.59	37.89	36.15
3421	Male	4304	2019-06-22	wt	17.31	18.7	22.5	23.55	24.56	25.81	27.44	27.98			33.14	35.25	40.35	43.2	45.93	47.72	47.2
WT AVE					14.1733	17.7533	20.6867	22.4733	23.555	24.8067	25.365	26.1117	26.212	26.564	31.0867	32.8517	36.3383	38.2883	39.7383	41.82	41.62
HET AVE					13.2687	17.9937	19.5362	21.7413	23.6025	24.4413	25.1113	25.4513	25.8575	26.54	29.9057	30.4462	33.4338	35.1375	36.9712	38.8937	38.7988
KO AVE					12.6533	17.0811	18.9578	20.7767	22.1944	23.0244	23.0589	23.7889	24.2811	24.81	27.8333	28.6878	31.51	33.1722	34.4733	36.4611	36.1556
TTEST WT Vs KO					0.0939038	0.267124	0.013981	0.0291674	0.174233	0.0598683	0.0408177	0.0363504	0.127689	0.147453	0.0147906	0.00611013	0.0117649	0.0122684	0.0223358	0.023537	0.0502468

## Sheet: Organ weights and lenght
mouse	sex	Cage	Date of Birth	Genotype	BW	length mm	liver (g)	heart (g)	gWAT (g)	iWAT (g)	BAT (g)	TA (g)	soleus (g)	Gas (g)	EDL (g)
2529	Male	4305	2019-06-15	het	40.06	10.2	1.1853	0.1368	2.9814	1.4135	0.1504	0.1003	0.0171	0.2865	0.0226
2912	Male	4305	2019-06-12	het	35.03	9.9	1.1133	0.1327	2.2351	0.7583	0.146	0.0948	0.0163	0.2463	0.0191
2915	Male	4304	2019-06-12	het	38.68	9.6	0.9771	0.1399	3.0255	1.7583	0.092	0.0912	0.0182	0.2646	0.0195
2916	Male	4304	2019-06-12	het	43.51	10.2	1.2806	0.1382	3.0709	2.3087	0.1439	0.1025	0.0178	0.299	0.0181
2919	Male	4306	2019-06-12	het	49.71	10.5	2.888	0.1847	1.7289	1.98	0.2858	0.1412	0.0216	0.3103	0.0267
2923	Male	4307	2019-06-15	het	37.9	10	1.2195	0.1381	2.1807	0.9793	0.1219	0.1018	0.0181	0.2786	0.0219
2929	Male	4305	2019-06-15	het	35.56	9.6	1.1128	0.128	2.5577	1.072	0.0943	0.0705	0.0153	0.2449	0.0204
3428	Male	4308	2019-06-22	het	37.9	9.7	1.397			1.0378	0.1488	0.0925	0.0174	0.2677	0.0176
2914	Male	4306	2019-06-12	ko	45.55	10.1	1.4309	0.1769	3.1448	1.5786	0.173	0.1058	0.0224	0.2847	0.0289
2926	Male	4307	2019-06-15	ko	41.36	9.7	1.1849	0.1321	2.5002	2.2817	0.1501	0.0979	0.0184	0.2809	0.0193
2939	Male	4305	2019-06-13	ko	34.6	10	0.9076	0.1184	2.1588	1.1592	0.1126	0.0768	0.0171	0.2578	0.0183
2550	Male	4306	2019-06-14	ko	35.52	10	1.0805	0.1357	2.2025	0.841	0.0781	0.1022	0.0164	0.2784	0.018
2983	Male	4304	2019-06-16	ko	41.55	10	1.2355	0.1377	3.2562	2.0677	0.1609	0.0941	0.0176	0.2812	0.0154
2988	Male	4304	2019-06-16	ko	37.3	10	1.0259	0.1231	2.9149	1.2995	0.1025	0.1019	0.0185	0.2731	0.0191
3434	Male	4308	2018-06-28	ko	34.78	9.9	1.3081	0.1385	1.7652	0.6456	0.1314	0.0996	0.0254	0.3136	0.0219
3426	Male	4308	2019-06-22	ko	33.47	10	1.1999	0.1283	1.9199	1.0255	0.136	0.0883	0.0164	0.289	0.0198
2925	Male	4306	2019-06-15	wt	45.47	10.1	1.6466	0.1505	2.407	2.1	0.2057	0.1055	0.0222	0.2961	0.0186
2941	Male	4307	2019-06-14	wt	46.53	10.2	1.6619	0.1545	2.5511	2.1935	0.1271	0.1148	0.0203	0.3577	0.0229
2948	Male	4307	2019-06-13	wt	39.18	9.7	1.103	0.12	2.6286	1.7201	0.1518	0.0908	0.0121	0.2568	0.0198
2419	Male	4305	2019-06-22	wt	41.16	10	1.4804	0.1383	2.5572	1.5131	0.2105	0.0958	0.0163	0.3136	0.0233
3420	Male	4308	2019-06-22	wt	38.12	9.8	1.2867	0.1251	2.4501	1.1372	0.1821	0.1012	0.0164	0.289	0.0283
3421	Male	4304	2019-06-22	wt	48.25	10.3	2.4465	0.164	1.7419	1.8747	0.2316	0.1031	0.0164	0.3141	0.0211
				Average WT	43.1183	10.0167	1.60418	0.142067	2.38932	1.75643	0.1848	0.101867	0.0172833	0.30455	0.0223333
				Average Het	39.7938	9.9625	1.3967	0.142629	2.54003	1.41349	0.147888	0.09935	0.017725	0.274737	0.0207375
				Average KO	38.0162	9.9625	1.17166	0.136338	2.48281	1.36235	0.130575	0.095825	0.019025	0.282338	0.0200875

## Sheet: Body composition HFD
No	1	Sex	DOB	Date / Time	Genotype	Weight (g)	Fat (g)	Lean (g)	M Fluid(g)	Fat (w%)	Lean (w%)	Fluid (%)
3	2923	Male	2019-06-15	2019.10.14 / 14:32:28	HET	34.5	8.885	21.083	1.807	25.75	61.11	5.23768
5	2919	Male	2019-06-12	2019.10.14 / 14:36:29	HET	46.5	17.692	24.099	2.727	38.05	51.82	5.86452
10	2912	Male	2019-06-12	2019.10.14 / 14:47:06	HET	31.9	7.168	20.087	1.708	22.47	62.97	5.35423
11	2529	Male	2019-06-15	2019.10.14 / 14:48:50	HET	31	7.739	18.988	1.4	24.97	61.25	4.51613
12	2929	Male	2019-06-15	2019.10.14 / 14:50:38	HET	33.9	9.301	20.081	1.789	27.44	59.23	5.27729
15	2915	Male	2019-06-12	2019.10.14 / 14:56:44	HET	34.5	10.771	19.644	1.658	31.22	56.94	4.8058
16	2916	Male	2019-06-12	2019.10.14 / 14:58:38	HET	38.6	12.456	21.426	2.228	32.27	55.51	5.77202
3	3428	Male	2019-06-22	2019.10.23 / 09:20:48	HET	33.1	9.901	19.259	1.595	29.91	58.19	4.81873
4	3426	Male	2019-06-22	2019.10.23 / 09:22:33	KO	30.5	7.911	19.07	1.506	25.94	62.52	4.9377
1	2926	Male	2019-06-15	2019.10.14 / 14:28:00	KO	36	12.74	19.332	1.934	35.39	53.7	5.37222
6	2924	Male	2019-06-15	2019.10.14 / 14:38:34	KO	31.7	9.477	18.215	1.602	29.9	57.46	5.05363
8	2550	Male	2019-06-14	2019.10.14 / 14:42:48	KO	33.9	9.401	20.033	1.9	27.73	59.09	5.60472
9	2939	Male	2019-06-13	2019.10.14 / 14:45:25	KO	30	8.357	17.712	1.502	27.86	59.04	5.00667
13	2914	Male	2019-06-12	2019.10.14 / 14:52:19	KO	39.1	11.858	22.257	2.256	30.33	56.92	5.76982
14	2988	Male	2019-06-16	2019.10.14 / 14:54:20	KO	33	8.859	19.819	1.701	26.84	60.06	5.15455
17	2983	Male	2019-06-16	2019.10.14 / 15:00:27	KO	35.2	9.858	20.801	1.822	28	59.09	5.17614
1	3434	Male	2019-06-28	2019.10.23 / 09:17:06	KO	30.3	5.796	20.135	1.002	19.13	66.45	3.30693
2	2948	Male	2019-06-13	2019.10.14 / 14:29:54	WT	33.6	10.686	18.462	1.856	31.8	54.95	5.52381
4	2941	Male	2019-06-14	2019.10.14 / 14:34:16	WT	41.1	13.964	21.993	2.599	33.98	53.51	6.3236
7	2925	Male	2019-06-15	2019.10.14 / 14:40:23	WT	41.4	14.91	21.957	2.382	36.01	53.04	5.75362
18	3421	Male	2019-06-22	2019.10.14 / 15:02:22	WT	43.7	15.205	23.249	2.606	34.79	53.2	5.96339
2	3420	Male	2019-06-22	2019.10.23 / 09:19:10	WT	33	10.032	19.242	1.486	30.4	58.31	4.50303
5	2419	Male	2019-06-22	2019.10.23 / 09:24:34	WT	36.5	11.951	20.428	2.173	32.74	55.97	5.95342
WT AVE						38.2167	12.7913	20.8885	2.18367	33.2867	54.83	5.67015
HET AVE						35.5	10.4891	20.5834	1.864	29.01	58.3775	5.2058
KO AVE						33.4571	9.80043	19.4911	1.77157	29.1414	58.3986	5.27133
SEM WT						1.82564	0.902629	0.747094	0.181146	0.836643	0.837214	0.25715
SEM HET						1.76342	1.18588	0.582477	0.148839	1.7435	1.27378	0.16734
SEM KO						1.02252	0.687047	0.452674	0.117367	1.43335	1.19368	0.235962

## Sheet: Daily food intake
0.5	Tag	Sex	body weight	aGenotype	2023-11-06	2023-11-07	2023-11-08	2023-11-09	2023-11-10
J7	824	Male		HET	24.19	20.92	17.52	15.03	11.94
K7	800	Male		HET	24.4	22.04	19.75	17.35	15
N7	833	Male		HET	23.52	20.46	17.78	14.95	12.53
R7	602	Male		HET	22.47	19.33	16.46	13.97	11.43
J8	877	Male		HET	26.52	23.51	21	17.73	14.87
K8	843	Male		HET	27.32	24.58	21.89	19	16
R8	999	Male		HET	24.55	21.32	18.86	16.31	13.7
N9	872	Male		HET	27.44	24.72	22.23	19.88	17.41
O9	845	male		HET	24.4	21.6	20	18.04	15.75
L7	831	Male		KO	24.21	21.89	19.28	16.33	13.86
O7	878	Male		KO	26.53	23.8	21.36	18.92	16.63
Q7	603	Male		KO	25.92	23.05	20.28	17.86	15.58
M8	834	Male		KO	26.15	23.55	21.3	18.85	16.69
N8	866	Male		KO	23.46	20.87	18.18	15.15	12.32
P8	865	Male		KO	25	21.72	18.67	15.9	12.86
Q9	869	Male		KO	23.26	20.16	17.29	14.66	12.28
R9	870	Male		KO	26.58	24	22.04	19.67	17.76
M7	828	Male		WT	28.79	26.04	23	19.62	16.57
P9	801	Male		WT	26.59	23.65	20.74	18.09	15.73
L8	852	Male		WT	24.63	21.26	18.5	15.97	13.9
O8	987	Male		WT	26.16	23.48	21.11	18.46	15.76
Q8	996	Male		WT	26.83	23.42	20.53	17.18	13.91
P9	871	Male		WT	23.36	20.61	18.18	16	13.54
0.5	Tag	Sex	body weight	aGenotype	2023-11-06	2023-11-07	2023-11-08	2023-11-09	2023-11-10		Average
J7	824	Male		HET	3.27	3.4	2.49	3.09			3.0625
K7	800	Male		HET	2.36	2.29	2.4	2.35			2.35
N7	833	Male		HET	3.06	2.68	2.83	2.42			2.7475
R7	602	Male		HET	3.14	2.87	2.49	2.54			2.76
J8	877	Male		HET	3.01	2.51	3.27	2.86			2.9125
K8	843	Male		HET	2.74	2.69	2.89	3			2.83
R8	999	Male		HET	3.23	2.46	2.55	2.61			2.7125
N9	872	Male		HET	2.72	2.49	2.35	2.47			2.5075
O9	845	male		HET	2.8	1.6	1.96	2.29			2.1625
L7	831	Male		KO	2.32	2.61	2.95	2.47			2.5875
O7	878	Male		KO	2.73	2.44	2.44	2.29			2.475
Q7	603	Male		KO	2.87	2.77	2.42	2.28			2.585
M8	834	Male		KO	2.6	2.25	2.45	2.16			2.365
N8	866	Male		KO	2.59	2.69	3.03	2.83			2.785
P8	865	Male		KO	3.28	3.05	2.77	3.04			3.035
Q9	869	Male		KO	3.1	2.87	2.63	2.38			2.745
R9	870	Male		KO	2.58	1.96	2.37	1.91			2.205
M7	828	Male		WT	2.75	3.04	3.38	3.05			3.055
P9	801	Male		WT	2.94	2.91	2.65	2.36			2.715
L8	852	Male		WT	3.37	2.76	2.53	2.07			2.6825
O8	987	Male		WT	2.68	2.37	2.65	2.7			2.6
Q8	996	Male		WT	3.41	2.89	3.35	3.27			3.23
P9	871	Male		WT	2.75	2.43	2.18	2.46			2.455
				WT	2.98333	2.73333	2.79	2.65167			2.78958
				Het	2.92556	2.55444	2.58111	2.62556			2.67167
				KO	2.75875	2.58	2.6325	2.42			2.59781
				pvalue	0.215534	0.394746	0.440385	0.305145			0.219391

## Sheet: Statistics body weight
Table Analyzed	Body weight
Mixed-effects model (REML)	Matching: Stacked
Assume sphericity?	No
Alpha	0.05
Fixed effects (type III)	P value	P value summary	Statistically significant (P < 0.05)?	F (DFn, DFd)	Geisser-Greenhouse's epsilon
Time	<0.0001	****	Yes	F (1.746, 34.59) = 457.1	0.1091
geno	0.0648	ns	No	F (2, 20) = 3.148
Time x geno	0.0048	**	Yes	F (32, 317) = 1.841
Random effects	SD	Variance
Subject	2.294	5.26
Residual	1.671	2.791
Was the matching effective?
Chi-square, df	285.8, 1
P value	<0.0001
P value summary	****
Is there significant matching (P < 0.05)?	Yes
Data summary
Number of columns (geno)	3
Number of rows (Time)	17
Number of subjects (Subject)	23
Number of missing values	3

## Sheet: Statistics NMR fat
Table Analyzed	Copy of NMR fat
Data sets analyzed	A-C
ANOVA summary
F	3.246
P value	0.0601
P value summary	ns
Significant diff. among means (P < 0.05)?	No
R squared	0.245
Brown-Forsythe test
F (DFn, DFd)	1.210 (2, 20)
P value	0.3192
P value summary	ns
Are SDs significantly different (P < 0.05)?	No
Bartlett's test
Bartlett's statistic (corrected)	3.517
P value	0.1723
P value summary	ns
Are SDs significantly different (P < 0.05)?	No
ANOVA table	SS	DF	MS	F (DFn, DFd)	P value
Treatment (between columns)	110.1	2	55.04	F (2, 20) = 3.246	P=0.0601
Residual (within columns)	339.2	20	16.96
Total	449.2	22
Data summary
Number of treatments (columns)	3
Number of values (total)	23

## Sheet: Statistics ITT
Table Analyzed	ITT
Two-way RM ANOVA	Matching: Stacked
Assume sphericity?	No
Alpha	0.05
Source of Variation	% of total variation	P value	P value summary	Significant?	Geisser-Greenhouse's epsilon
Time x geno	5.136	0.0488	*	Yes
Time	31.94	<0.0001	****	Yes	0.6813
geno	9.745	0.0538	ns	No
Subject	28.71	<0.0001	****	Yes
ANOVA table	SS	DF	MS	F (DFn, DFd)	P value
Time x geno	3757	8	469.6	F (8, 80) = 2.067	P=0.0488
Time	23365	4	5841	F (2.725, 54.51) = 25.71	P<0.0001
geno	7129	2	3564	F (2, 20) = 3.394	P=0.0538
Subject	21002	20	1050	F (20, 80) = 4.622	P<0.0001
Residual	18174	80	227.2
Data summary
Number of columns (geno)	3
Number of rows (Time)	5
Number of subjects (Subject)	23
Number of missing values	0

## Sheet: Statistics NMR lean
Table Analyzed	NMR lean
Data sets analyzed	A-C
ANOVA summary
F	3.625
P value	0.0454
P value summary	*
Significant diff. among means (P < 0.05)?	Yes
R squared	0.266
Brown-Forsythe test
F (DFn, DFd)	0.5179 (2, 20)
P value	0.6035
P value summary	ns
Are SDs significantly different (P < 0.05)?	No
Bartlett's test
Bartlett's statistic (corrected)	1.789
P value	0.4089
P value summary	ns
Are SDs significantly different (P < 0.05)?	No
ANOVA table	SS	DF	MS	F (DFn, DFd)	P value
Treatment (between columns)	77.74	2	38.87	F (2, 20) = 3.625	P=0.0454
Residual (within columns)	214.5	20	10.72
Total	292.2	22
Data summary
Number of treatments (columns)	3
Number of values (total)	23

## Sheet: Food chow
Food intake/kg body weight
mouse	sex	Date of Birth	Genotype	weight (kg)	food t=0	t=30	t=60	t=90	t=120	t=240
2529	Male	2019-06-15	het	20.9	0	0.5	0.8	1	1.1	1.5
2912	Male	2019-06-12	het	21.1	0	0.5	0.5	0.8	0.9	1.5
2915	Male	2019-06-12	het	21.7	0	0.6	1.2	1.2	1.2	1.5
2916	Male	2019-06-12	het	22.5	0	0.6	1	1.1	1.1	1.5
2919	Male	2019-06-12	het	25.6	0	0.7	0.9	1	1.4	2
2923	Male	2019-06-15	het	23.5	0	0.7	1	1.2	1.5	2.1
2929	Male	2019-06-15	het	22.5	0	0.5	0.9	1	1.3	1.8
3428	Male	2019-06-22	het	19.6	0	0.5	0.8	1	1.3	1.6
2914	Male	2019-06-12	ko	22.9	0	0.6	0.9	1.1	1.2	1.6
2924	Male	2019-06-15	ko	19.8	0	0.5	0.9	1	1	1.5
2926	Male	2019-06-15	ko	21.8	0	0.8	1.1	1.5	1.6	2
2939	Male	2019-06-13	ko	18.7	0	0.5	0.8	0.9	0.9	1.5
2550	Male	2019-06-14	ko	22.3	0	0.5	0.8	1	1.2	1.8
2983	Male	2019-06-16	ko	22.4	0	0.6	0.9	1.4	1.5	1.7
2988	Male	2019-06-16	ko	21.3	0	0.6	0.8	0.8	1.1	1.7
3434	Male	2018-06-28	ko	20.1	0	0.6	1	1.3	1.5	1.8
3426	Male	2019-06-22	ko	17.9	0	0.4	0.7	1	1.2	1.8
2925	Male	2019-06-15	wt	24.2	0	0.6	1	1	1.3	1.7
2941	Male	2019-06-14	wt	24.5	0	0.7	1.1	1.5	1.5	1.8
2948	Male	2019-06-13	wt	20.8	0	0.2	0.6	0.8	0.8	1.4
2419	Male	2019-06-22	wt	21	0	0.6	0.9	1.2	1.3	1.7
3420	Male	2019-06-22	wt	19	0	0.5	0.8	1.1	1.3	1.7
3421	Male	2019-06-22	wt	22.8	0	0.5	0.8	0.9	1	1.5
			WT Ave	22.05	0	0.516667	0.866667	1.08333	1.2	1.63333
			Het Ave	22.175	0	0.575	0.8875	1.0375	1.225	1.6875
			KO Ave	20.8	0	0.566667	0.877778	1.11111	1.24444	1.71111

## Sheet: Food HFD
	Tag	Sex	body weight	Genotype	T =0	T = 30	T= 60	T= 90	T= 120	T=240
4	872	Male	18.27	HET	0	0.64	0.8	0.83	0.99	1.3
5	845	male	24	HET	0	0.79	1.04	1.05	1.16	1.54
9	999	Male	23	HET	0	0.76	0.85	0.86	0.98	1.46
11	843	Male	20.38	HET	0	0.59	0.72	0.84	0.98	1.29
14	824	Male	23.65	HET	0	0.68	0.78	0.96	0.99	1.41
17	833	Male	23.88	HET	0	0.64	0.78	0.8	0.83	1.14
18	800	Male	22	HET	0	0.66	0.66	0.8	0.84	1.34
20	877	Male	22.41	HET	0	0.54	0.78	0.88	0.99	1.32
23	602	Male	22	HET	0	0.78	0.89	0.97	1.21	1.51
1	865	Male	25.8	KO	0	0.75	0.79	0.87	0.94	1.23
6	869	Male	22.15	KO	0	0.73	0.98	0.98	1.07	1.39
7	870	Male	19.93	KO	0	0.69	0.77	0.84	1.02	1.41
10	834	Male	21.61	KO	0	0.73	0.91	0.94	1.11	1.43
13	866	Male	22.82	KO	0	0.64	0.75	0.76	0.84	1.23
16	831	Male	23.76	KO	0	0.75	0.96	1.07	1.15	1.49
21	878	Male	22	KO	0	0.85	0.87	1.06	1.22	1.78
22	603	Male	22.33	KO	0	0.6	0.72	0.91	1.05	1.37
2	987	Male	21.08	WT	0	0.73	0.91	0.92	1.19	1.54
3	871	Male	23.83	WT	0	0.67	0.76	0.78	0.79	1.17
8	996	Male	22.58	WT	0	0.77	0.89	0.89	1.07	1.44
12	852	Male	26.28	WT	0	0.84	1.02	1.15	1.25	1.75
15	828	Male	24.37	WT	0	0.79	0.96	1.02	1.19	1.44
19	801	Male	19.84	WT	0	0.71	0.97	1.04	1.16	1.6
			22.9967	WT Ave	0	0.751667	0.918333	0.966667	1.10833	1.49
			22.1767	Het Ave	0	0.675556	0.811111	0.887778	0.996667	1.36778
			22.55	KO Ave	0	0.7175	0.84375	0.92875	1.05	1.41625

[truncated: 4 more sheets: GTT, ITT, Harlan Teklad 2016 NCD, D1246 diet HFD]
